# Supplementary material
Source: PubMed Central journal article supplement (PMC4935931)

# Supplementary Figure 1

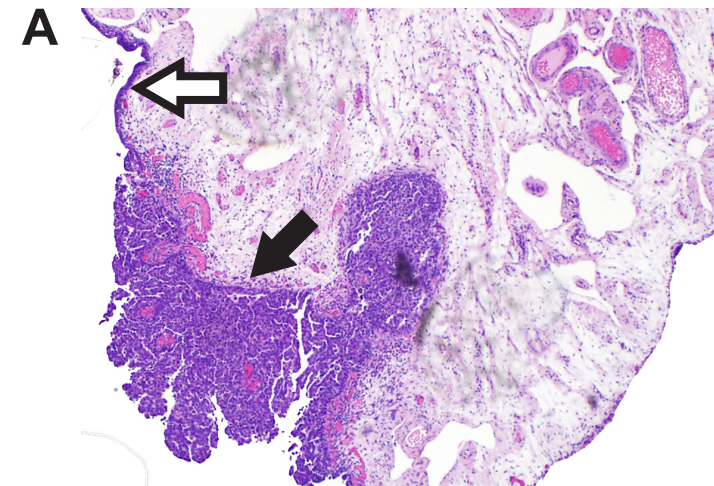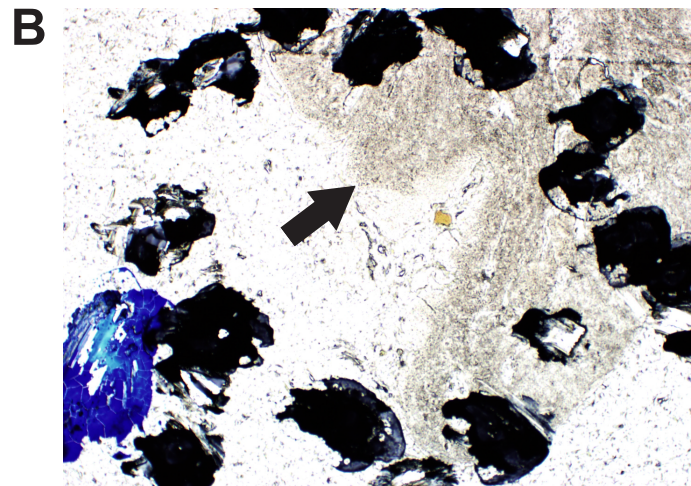

Unstained  
pre-dissection

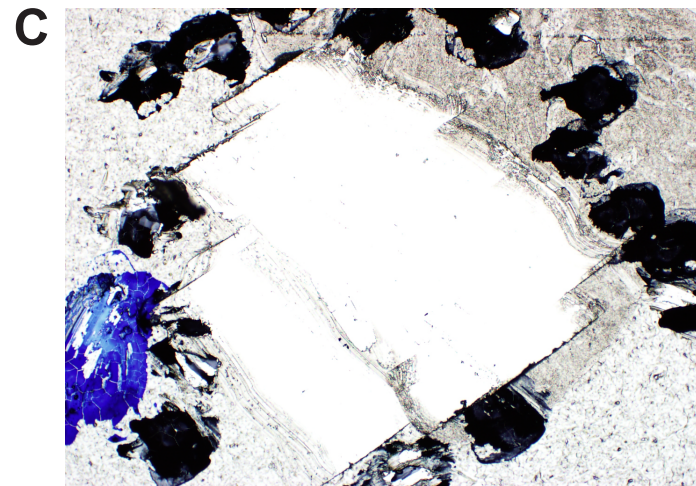

Unstained  
post-dissection

Supplement: NIHMS797838-supplement-Figure_S1.pdf [file NIHMS797838-supplement-Figure_S1.pdf]
